# Supplementary material for: Modified carbon nanotubes by KMnO4 supported iron Fischer–Tropsch catalyst for the direct conversion of syngas to lower olefins
Source: Royal Society of Chemistry journal article supplement (doi:10.1039/c4ta05202a), 2015-01-01
Supplement: c4ta05202a1.pdf [file c4ta05202a1.pdf]

**Supporting Information**

**Modified carbon nanotubes by KMnO<sub>4</sub> supported iron Fischer-Tropsch  
catalyst for direct conversion of syngas to lower olefins**

Di Wang,<sup>a</sup> Xiangping Zhou,<sup>a</sup> Jian Ji,<sup>a</sup> Xuezhi Duan,<sup>\* a</sup> Gang Qian,<sup>a</sup> Xinggui Zhou,<sup>a</sup> De  
Chen<sup>b</sup> and Weikang Yuan<sup>a</sup>

<sup>a</sup> *State Key Laboratory of Chemical Engineering, East China University of Science and  
Technology, Shanghai, 200237, P. R. China*

<sup>b</sup> *Department of Chemical Engineering, Norwegian University of Science and  
Technology, Trondheim 7491, Norway*

\* Corresponding author. Tel: +86-21-64250937; Fax: +86-21-64253528

E-mail address: [xzduan@ecust.edu.cn](mailto:xzduan@ecust.edu.cn)

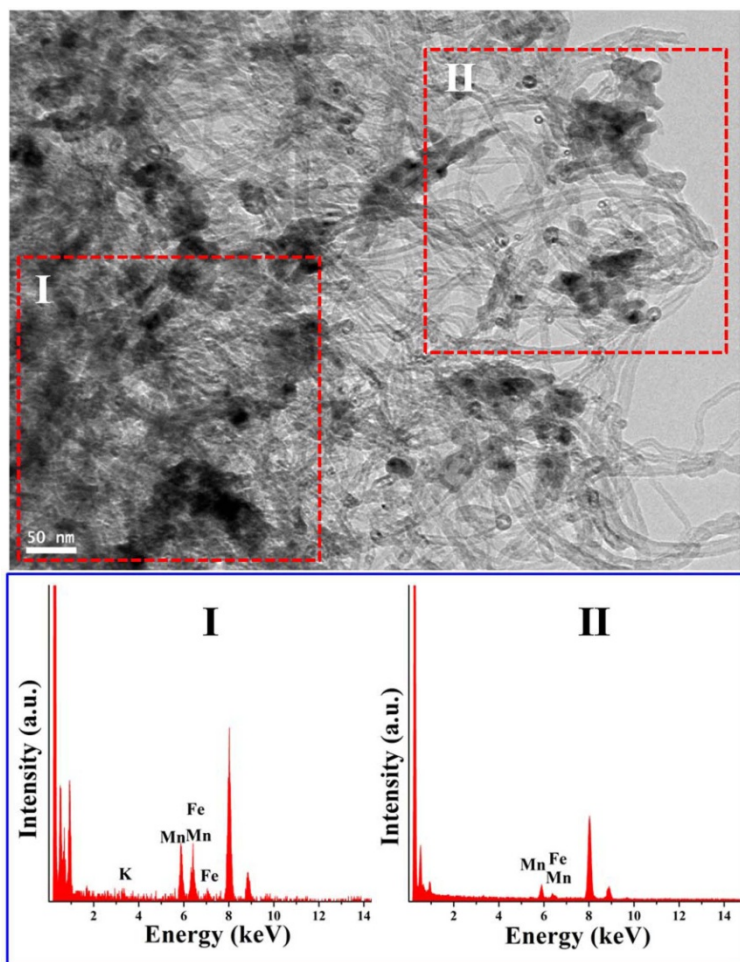

**Fig. S1** TEM image and EDS spectra of different areas of FeMnK/CNTs catalyst.

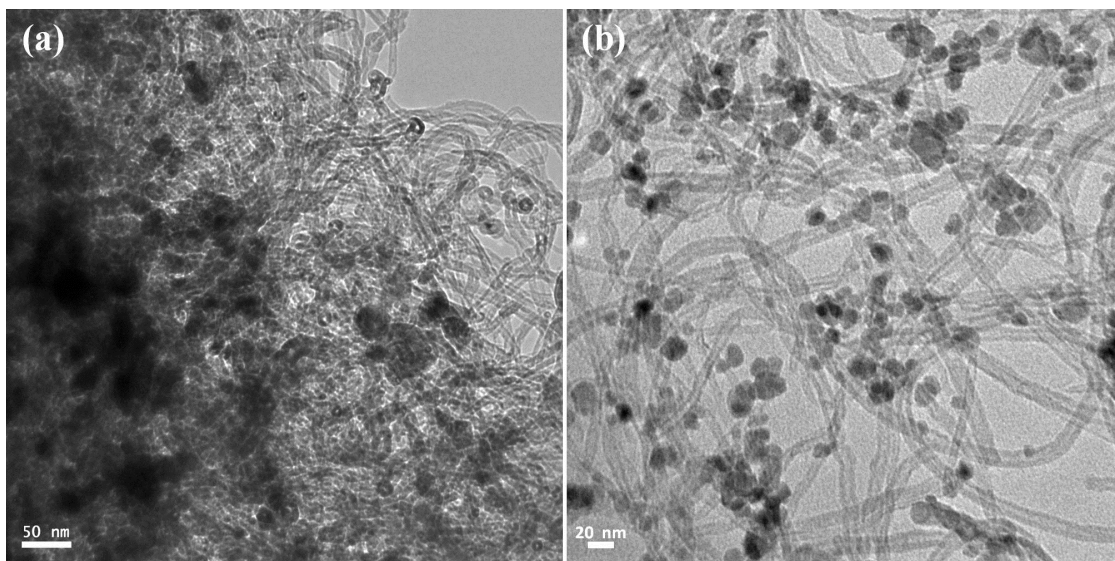

**Fig. S2** Representative TEM images of used FeMnK/CNTs (a) and Fe/MnK-CNTs(b) catalysts.
